# Supplementary material
Source: ML conference proceedings conference paper supplement (https://proceedings.mlr.press/v37/wilson15.html)
Supplement: Supplementary file [file wilson15-supp.pdf]

# Supplementary Material: Kernel Interpolation for Scalable Structured Gaussian Processes (KISS-GP)

Andrew Gordon Wilson  
Carnegie Mellon University  
andrewgw@cs.cmu.edu

Hannes Nickisch  
Philips Research Hamburg  
hannes@nickisch.org

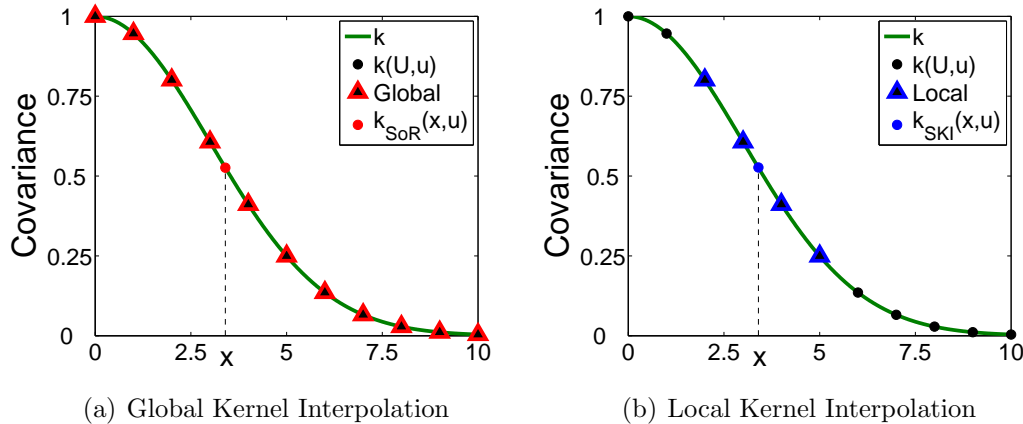

Figure 1: Global vs. local kernel interpolation. Triangle markers denote the inducing points used for interpolating  $k(x, u)$  from  $k(U, u)$ . Here  $u = 0$ ,  $U = \{0, 1, \dots, 10\}$ , and  $x = 3.4$ . a) All conventional inducing point methods, such as SoR or FITC, perform global GP regression on  $K_{U,u}$  (a vector of covariances between all inducing points  $U$  and the point  $u$ ), at test point  $x_* = x$ , to form an approximate  $\tilde{k}$ , e.g.,  $k_{\text{SoR}}(x, u) = K_{x,U} K_{U,U}^{-1} K_{U,u}$ , for any desired  $x$  and  $u$ . b) SKI can perform local kernel interpolation on  $K_{U,u}$  to form the approximation  $k_{\text{SKI}}(x, u) = \mathbf{w}_x^\top K_{U,u}$ .
